# Supplementary material for: Delivery of large transgene cassettes by foamy virus vector
Source: PubMed Central journal article supplement (PMC5556010; doi:10.1038/s41598-017-08312-3), 2017-08-14
Supplement: 41598_2017_8312_MOESM1_ESM.pdf [file 41598_2017_8312_MOESM1_ESM.pdf]

Delivery of large transgene cassettes by foamy virus vector.

Nathan Paul Sweeney, Jinhong Meng, Hayley Patterson, Jennifer E. Morgan, Myra McClure.

## **Supplementary Material**

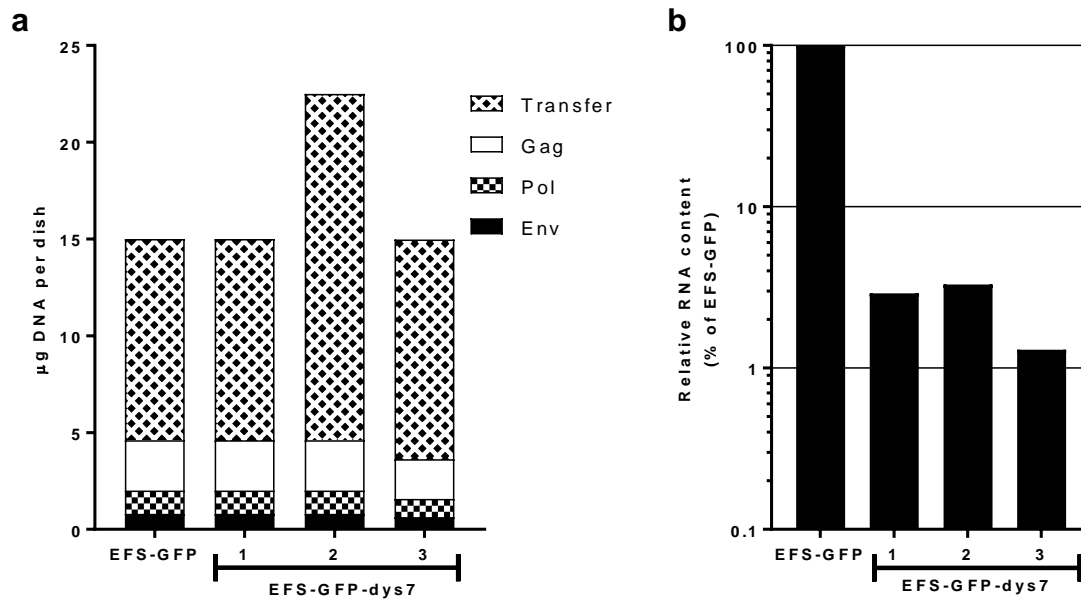

Figure S1 – Maintaining mass or molar plasmid ratios for large transfer vector production

does not affect titre. (a) The amount of each plasmid (per 55 cm<sup>2</sup> dish) co-transfected in 293T cells for production of FVV is shown for DF-EFS-GFP and transfections 1-3 for DF-EFS-GFP-dys7. Transfection 1 uses the same mass of each plasmid as for EFS-GFP, whereas transfections 2 and 3 retain the same molar ratio of each plasmid by increasing the mass of transfer vector added (transfection 2) or decreasing the mass of packaging plasmids added (transfection 3). (b) The relative quantity of FVV RNA released into the cell-culture supernatant from the various transfections was quantified by RT-qPCR.

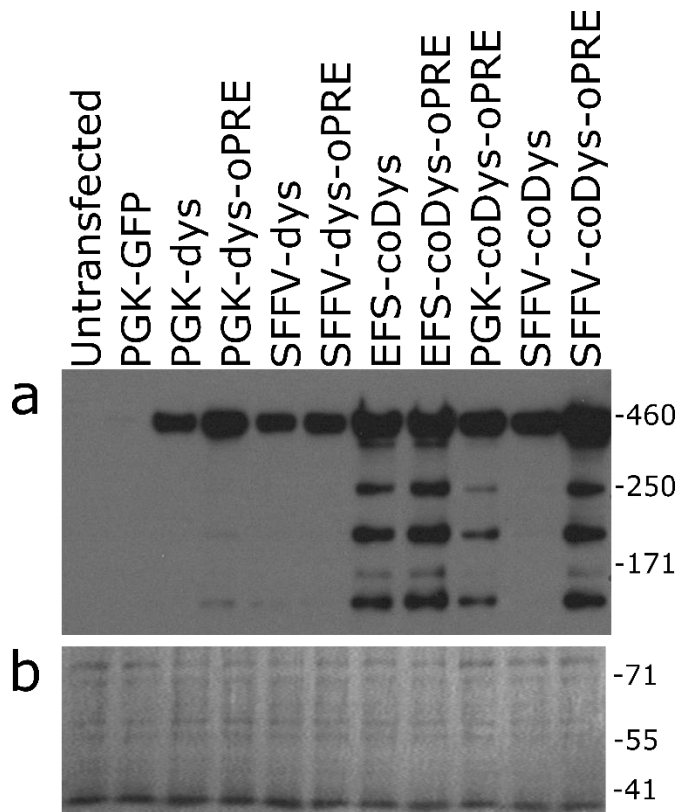

Figure S2 – Full-length dystrophin is expressed from transfer plasmids in transfected 293T cells. (a) Cell lysates from 293T cells transfected with FVV transfer plasmid pDDF, carrying the insert labelled above each lane, were analysed by Western blotting for dystrophin expression. (b) Ponceau S staining was used as a loading control.

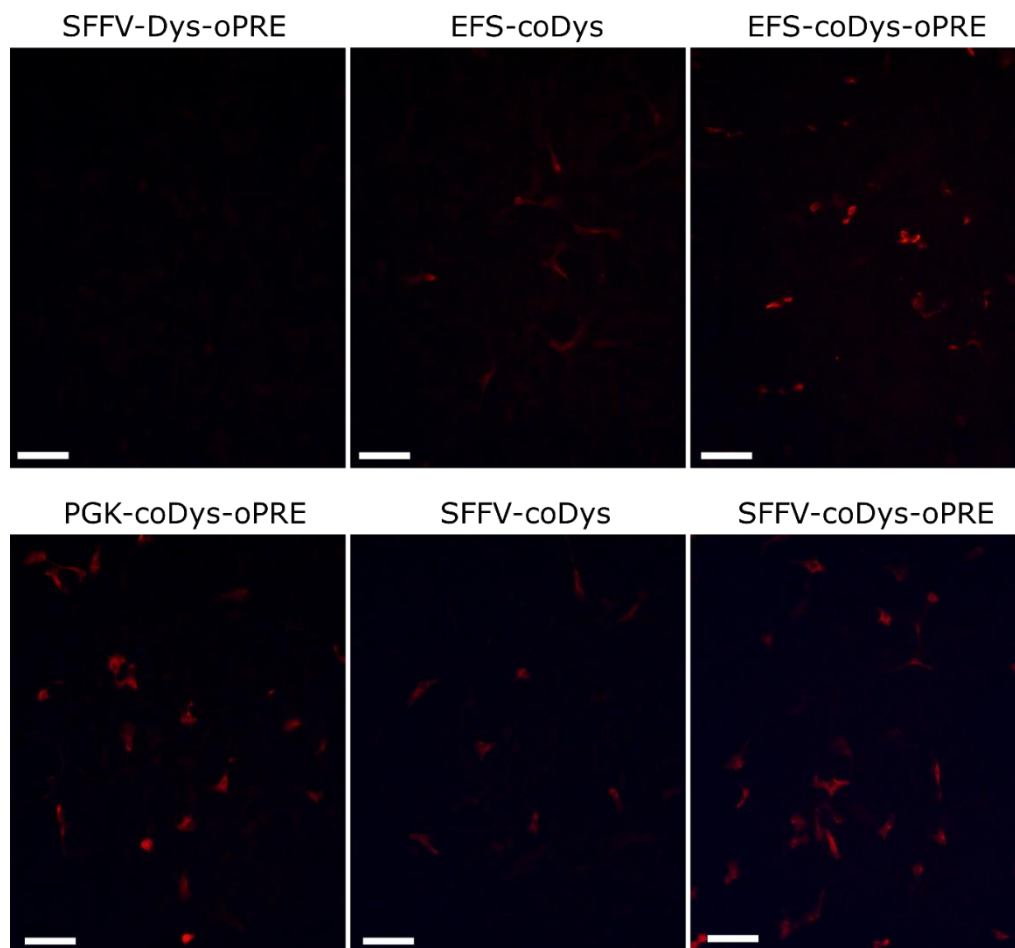

Figure S3 – Immunofluorescence analysis of dystrophin expression in FVV transduced HT1080 cells. Photomicrographs of transduced HT1080 cells are shown following immunostaining to detect dystrophin expression. Cells were confluent in all images and acquisition settings were the same for each sample. Where available, fields of view containing a high number of dystrophin-expressing cells were selected. The transgene cassette within each FVV (DDF) used to transduce each sample is labelled above each photomicrograph. Of the transductions that did not result in detectable dystrophin expression, only DDF-SFFV-Dys-oPRE is shown. Results are summarised in Table 2. Scale bar = 20  $\mu$ m.

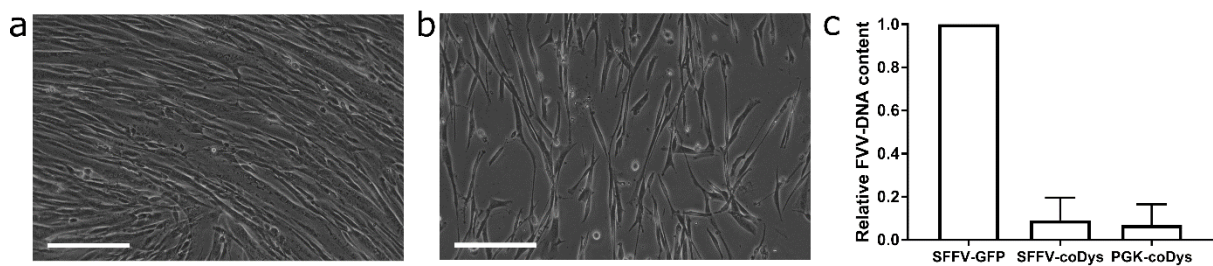

Figure S4 – Transduction of muscle stem cells with coDys encoding FVV at high MOI affects proliferation and is ineffective. Muscle stem cells (lines 2 and 3) were transduced, in parallel, at a MOI of 10 with DDF-SFFV-coDys-oPRE and DDF-PGK-coDys-oPRE. Representative photomicrographs show muscle stem cells (line 3) that were mock-transduced (a) or transduced with DDF-SFFV-coDys-oPRE at an MOI of 10 (b) taken 4 days post-transduction. The amount of FVV-DNA in genomic DNA preps (data pooled for lines 2 and 3) taken 2 passages post-transduction with the FVVs indicated (DDF-*promoter-transgene*-oPRE) was determined by qPCR (c). Mean + SD is shown.

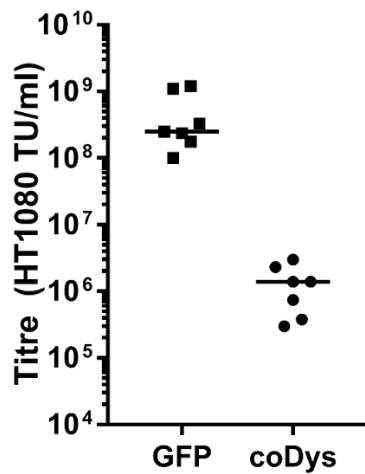

Figure S5 – Titres of concentrated FVVs produced during this study. Where determined, the titre of all small (<2 kb insert) GFP-encoding vectors or full-length coDys->12 kb insert) encoding vectors produced during the course of this study (containing any promoter) is shown. Each point represents a different vector preparation. The horizontal line shows the median average.

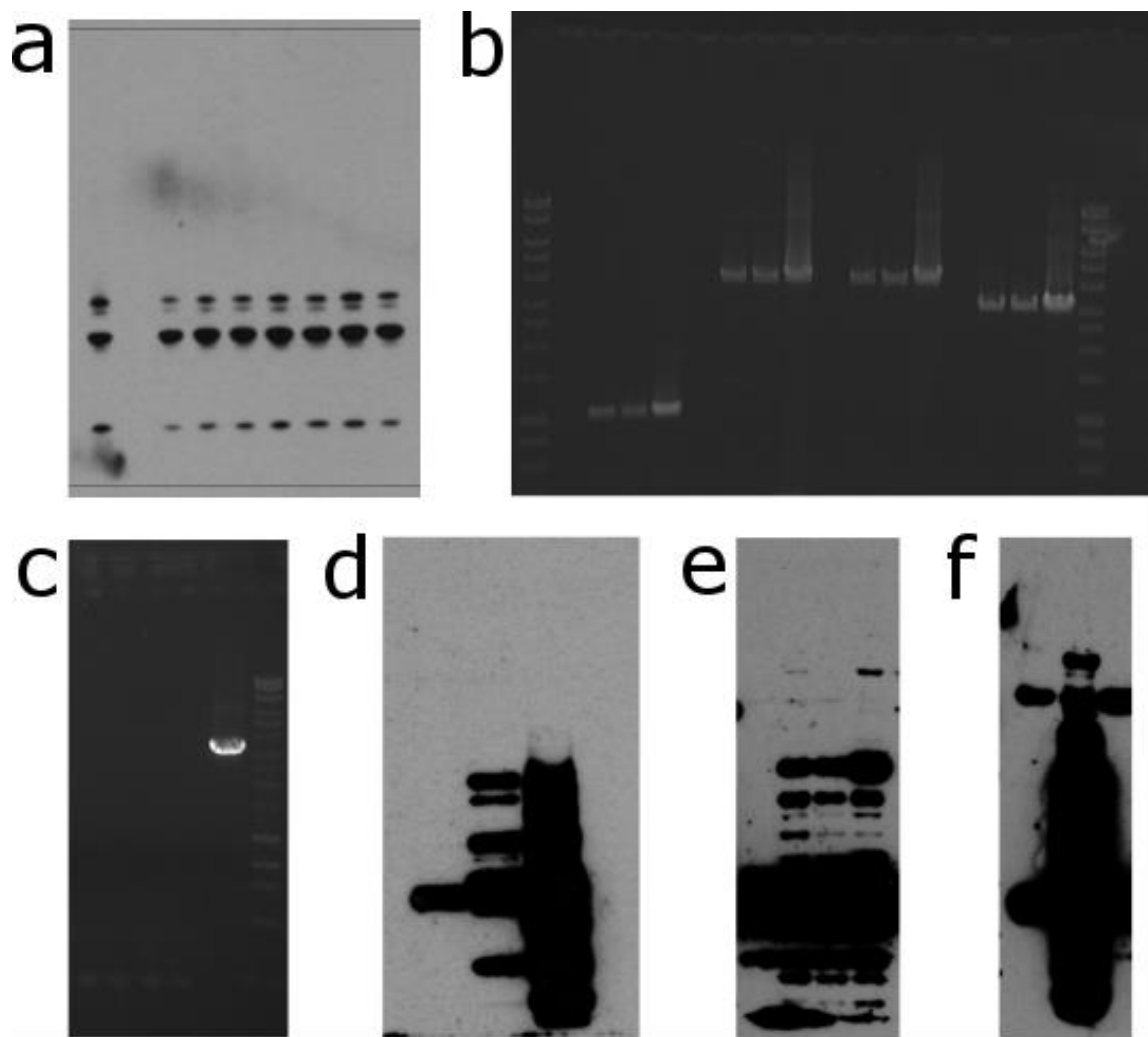

Figure S6 – Full-length DNA gels and Western blots

Full-length images of cropped Western blots and DNA gels from the main text are shown. (a) is full-length blot of Fig. 2c and has blot top and bottom edges marked for visibility; (b) is full-length gel of Fig. 4b; (c) is full-length gel of Fig. 4c; (d) is full-length blot of Fig. 5c; (e) is full-length blot of Fig. 5d; (f) is full-length blot of Fig. 6d.

Table S1 – Plasmids used in this study

| Name                | Description and source or construction                                                                                                                                                                                                                                                                                                                                                   |
|---------------------|------------------------------------------------------------------------------------------------------------------------------------------------------------------------------------------------------------------------------------------------------------------------------------------------------------------------------------------------------------------------------------------|
| pcoSE               | Encodes SFV <sub>mac</sub> Env <sup>1</sup> , provided by D. Lindemann (Dresden, Germany)                                                                                                                                                                                                                                                                                                |
| pcoPG4              | Encodes PFV Gag <sup>2</sup> , provided by D. Lindemann (Dresden, Germany)                                                                                                                                                                                                                                                                                                               |
| pcoPP wt            | Encodes PFV Pol <sup>2</sup> , provided by D. Lindemann (Dresden, Germany)                                                                                                                                                                                                                                                                                                               |
| pCIhDysGFP          | Encodes a Dystrophin.GFP fusion - Provided by Olivier Danos                                                                                                                                                                                                                                                                                                                              |
| pDF                 | Empty PFV transfer vector, provided by D. Russell (Seattle, WA) <sup>3</sup>                                                                                                                                                                                                                                                                                                             |
| pDF-EFS-GFP         | Previously described transfer vector <sup>1</sup>                                                                                                                                                                                                                                                                                                                                        |
| pDF-EFS-GFP-WPRE    | Previously described transfer vector <sup>1</sup>                                                                                                                                                                                                                                                                                                                                        |
| pDF-EFS-ARSA-oPRE   | Previously described transfer vector <sup>1</sup> contains the oPRE <sup>4</sup>                                                                                                                                                                                                                                                                                                         |
| pDF-PGK-GFP         | The murine PGK promoter was amplified using primers PGK_F and PGK_R and replaced EFS as a ClaI-KpnI fragment in pDF-EFS-GFP.                                                                                                                                                                                                                                                             |
| pDF-PGK-GFP-WPRE    | The PGK promoter was transferred as a ClaI-KpnI fragment from pDF-PGK-GFP to replace EFS in pDF-EFS-GFP-WPRE.                                                                                                                                                                                                                                                                            |
| pDF-EFS-GFP-dys7    | pDF-EFS-GFP was amplified using primers Gib-Dys-eg and gib-dys7v. Dys7 was amplified from pCIhDysGFP using gib-eg-dysF and gib-dys7i. The fragments were joined by Gibson assembly.                                                                                                                                                                                                      |
| pDF-EFS-dys8        | As above, but using gib-dys8v and gib-dys8i.                                                                                                                                                                                                                                                                                                                                             |
| pDF-EFS-dys9        | As above, but using gib-dys9v and gib-dys9i.                                                                                                                                                                                                                                                                                                                                             |
| pDF-EFS-dys10       | As above, but using gib-dys10v and gib-dys10i.                                                                                                                                                                                                                                                                                                                                           |
| pDF-EFS-dysFL       | As above, but using gib-dys11v and gib-dys11i.                                                                                                                                                                                                                                                                                                                                           |
| pDF-PGK-Dys         | pDF-PGK was amplified with primers Gib-PGK-v and Gib-dys11v. Dys was amplified from pCIhDysGFP using primers Gib3F and Gib-dys11i. PCR products were fused using Gibson assembly.                                                                                                                                                                                                        |
| pDF-PGK-Dys.GFP     | As for DF-PGK-Dys but using primer Gib3R-gfp.                                                                                                                                                                                                                                                                                                                                            |
| pDDF-empty          | pDF was amplified in 3 parts – 1. AmpsF and CasII_DDF_R; 2. cPPT_DDF_F and AmpsR; 3. CASII_DDF_F and cPPT_DDF_R. The pieces were joined by Gibson assembly.                                                                                                                                                                                                                              |
| pDDF-EFS-GFP        | EFS-GFP was transferred as a ClaI/NotI fragment from pDF-EFS-GFP to pDDF-empty                                                                                                                                                                                                                                                                                                           |
| pDDF-EFS-GFP-dys(n) | All variations of EFS-GFP-dys(n) were excised from the pDF- plasmid using AgeI/NotI and inserted into pDDF-EFS-GFP.                                                                                                                                                                                                                                                                      |
| pDDF-PGK-GFP-WPRE   | PGK-GFP-WPRE was transferred as a ClaI/NotI fragment from pDF-PGK-GFP-WPRE to pDDF-empty.                                                                                                                                                                                                                                                                                                |
| pDDF-PGK-dys        | PGK-GFP-WPRE was excised from pDDF-PGK-GFP-WPRE using AgeI/NotI and replaced with PGK-Dys from pDF-PGK-Dys                                                                                                                                                                                                                                                                               |
| pDDF-PGK-dys.GFP    | As above but using pDF-PGK-Dys.GFP for the insert.                                                                                                                                                                                                                                                                                                                                       |
| pDDF-PGK-Dys-oPRE   | DDF-PGK-Dys was amplified using AmpsF and Gib-Dys11i from pDDF-PGK-Dys. The oPRE was amplified with the 3' transfer vector using NotI-oPRE_F and AmpsR. The products were assembled by Gibson assembly.                                                                                                                                                                                  |
| pDDF-SFFV-GFP-WPRE  | The SFFV promoter was amplified using primers SFFV_F and SFFV_R and inserted into pDDF-PGK-GFP-WPRE as a ClaI/KpnI fragment.                                                                                                                                                                                                                                                             |
| pDDF-SFFV-Dys       | DDF-SFFV was amplified from pDDF-SFFV-GFP-WPRE using primers AmpsF and SFFV-dys_R. Part of dystrophin was amplified using primers SFFV-dys_F and dys4sR. The fragments were fused by PCR using primers AmpSF and dys4sR. The remaining dystrophin sequences and vector backbone was amplified using dys4sF and AmpsR from pDDF-PGK-dys and the fragments were joined by Gibson assembly. |
| pDDF-SFFV-Dys-oPRE  | As for pDDF-SFFV-Dys except pDDF-PGK-dys-oPRE was used as template rather than pDDF-PGK-dys.                                                                                                                                                                                                                                                                                             |
| pcoDys.full         | The whole dystrophin ORF from pCIhDysGFP was codon optimised using                                                                                                                                                                                                                                                                                                                       |



|                      |                                                                                             |
|----------------------|---------------------------------------------------------------------------------------------|
|                      | Geneart (Thermo Fisher). Sequence is available on request.                                  |
| pDDF-PGK-coDys-oPRE  | coDys from pcoDys.full was inserted into pDDF-PGK-dys-oPRE as a KpnI/NotI fragment.         |
| pDDF-EFS-coDys       | coDys from pcoDys.Full was inserted into pDDF-EFS-GFP as a KpnI/NotI fragment.              |
| pDDF-EFS-coDys-oPRE  | coDys-oPRE from pDDF-PGK-coDys-oPRE was inserted into pDDF-EFS-GFP as a KpnI/AscI fragment. |
| pDDF-SFFV-coDys      | coDys from pcoDys.full was inserted into pDDF-SFFV-GFP-WPRE as a KpnI/NotI fragment.        |
| pDDF-SFFV-coDys-oPRE | coDys from pcoDys.full was inserted into pDDF-SFFV-dys-oPRE as a KpnI/NotI fragment.        |

**Table S2 - Primers used in this study**

| <b>Name</b>    | <b>Sequence (modifications)</b>                               |
|----------------|---------------------------------------------------------------|
| 203F           | AGATTGTACGGGAGCTCTTCAC                                        |
| 203P           | TACTCGCTGCGTCGAGAGTGTACGA (5' FAM, 3' BHQ1)                   |
| 203R           | CAGAAAGCATTGCAATCACC                                          |
| Alb_F          | GCTGTCATCTCTTGTGGGCTGT                                        |
| Alb_P          | CCTGTCATGCCACACAAATCTCTCC (5' CALfluor gold 540, 3' BHQ1).    |
| Alb_R          | ACTCATGGGAGCTGCTGGTTC                                         |
| Alu-1          | TCCCAGCTACTGGGGAGGCTGAGG                                      |
| Alu-2          | GCCTCCCAAAGTGCTGGGATTACAG                                     |
| AmpsF          | GAGATCCAGTTCGATGTAACCCACTCGTGC                                |
| AmpsR          | GCACGAGTGGGTTACATCGAACTGGATCTC                                |
| CasII_DDF_F    | CCAAACAATAATTGACTATATTGGACCTTT                                |
| CasII_DDF_R    | TATAGTCAATTATTGTTTGGGATATCCTTT                                |
| CPPT_DDF_F     | CAACACAGGAGAGGGCCGGCCTCGACGGTATCGAT                           |
| CPPT_DDF_R     | GCCGGCCCTCTCCTGTGTTGTTTAAAGCAAGTTGT                           |
| Df_Opre_R      | GGCGCGCCTGATCTAGAGTCacgacaacaccacggaattatca                   |
| Gib(Dys)Sffv   | Acttcttcccacaaagcatggtaccgggagactcagtc                        |
| Gib-(Sffv)Dysf | Gactgagtcgcccgggtaccatgctttggtggaagaagt                       |
| Gib3f          | cctcatctcgggctttcgacctggtaccatgctttggtggaagaagtagaggactgt     |
| Gib3r          | ACGGCGGCCTGATCTAGAGTCGCGGCCgcttaCATTGTGTCctctctcattgctttccagg |
| Gib3R-GFP      | ACGGCGGCCTGATCTAGAGTCGCGGCCgcttactgtacagctcgtccatgccgagagt    |
| Gib-Dys10i     | CTTGCGGCCTGATCTAGAGTCgcgccgcaaagtgctttagactcctgtacctgaatcc    |
| Gib-Dys10v     | ggattcaggtacaggagtctaaagcactttgcgccgcGACTCTAGATCAGGCGCGCAAG   |
| Gib-Dys11i     | TCgcgccgcCATTGTGTCctctctcattg                                 |
| Gib-Dys11v     | gGACACAATGcgccgcGACTCTAGATCA                                  |
| Gib-Dys7i      | CTTGCGGCCTGATCTAGAGTCgcgccgcggttctcaagctttttcaagctgccc        |

|             |                                                              |
|-------------|--------------------------------------------------------------|
| Gib-Dys7v   | ttgggcagcttgaaaaaagcttgaagaccgcggccgcGACTCTAGATCAGGCGCGCAAG  |
| Gib-Dys8i   | CTTGCGCGCCTGATCTAGAGTcgcggccgcatattctctgttatcatgtggactttctg  |
| Gib-Dys8v   | cagaaaagtccacatgataacagagaatatcggccgcGACTCTAGATCAGGCGCGCAAG  |
| Gib-Dys9i   | CTTGCGCGCCTGATCTAGAGTcgcggccgcgcaaggtcattgacgtggctcactgtctct |
| Gib-Dys9v   | agagaacgtgagccacgtcaatgaccttgcgcggccgcGACTCTAGATCAGGCGCGCAAG |
| Gib-Dys-Eg  | acagtcctctacttcttccaccaaaagcatctagctactagctagctgagatctgagtc  |
| Gib-Eg-Dysf | ggactcagatctcgactagctagctagctagctgctttgggggaagaagtagaggactgt |
| Gib-Egv     | ccaaagcatctagctactagctagctgaga                               |
| Gib-Pgk-v   | accaaagcatggtaccaggtcgaaggccc                                |
| Noti-Opre_F | gcGGCCGCtatacaaaagtggagcatctta                               |
| Sffv_F      | GCATCGATgccattttgcaaggcatggaa                                |
| Sffv_R      | Gcggtagccggggcactcagtctgt                                    |
| SFFV-dys_F  | gactgagtcgccgggtaccatgctttgggggaagaagt                       |
| SFFV-dys_R  | acttctcccacaaagcatggtaccggggcactcagtc                        |
| Dys4sF      | gcatattggcacagaccctaacagatggcg                               |
| Dys4sR      | cgccatctgttaggtctgtgccaatagc                                 |

### Supplementary References

- 1 Sweeney, N. P. *et al.* Rapid and Efficient Stable Gene Transfer to Mesenchymal Stromal Cells Using a Modified Foamy Virus Vector. *Mol Ther* **24**, 1227-1236, doi:10.1038/mt.2016.91 (2016).
- 2 Stirnagel, K. *et al.* Analysis of Prototype Foamy Virus particle-host cell interaction with autofluorescent retroviral particles. *Retrovirology* **7**, 45 (2010).
- 3 Trobridge, G., Josephson, N., Vassilopoulos, G., Mac, J. & Russell, D. W. Improved foamy virus vectors with minimal viral sequences. *Mol Ther* **6**, 321-328 (2002).
- 4 Schambach, A. *et al.* Woodchuck hepatitis virus post-transcriptional regulatory element deleted from X protein and promoter sequences enhances retroviral vector titer and expression. *Gene Ther* **13**, 641-645 (2005).
